# Supplementary material for: Synergistic Anti-Tumor Effect of Simvastatin Combined to Chemotherapy in Osteosarcoma
Source: MDPI journal article supplement (doi:10.3390/cancers13225869), 2021-11-22
Supplement: s1 [file s1]

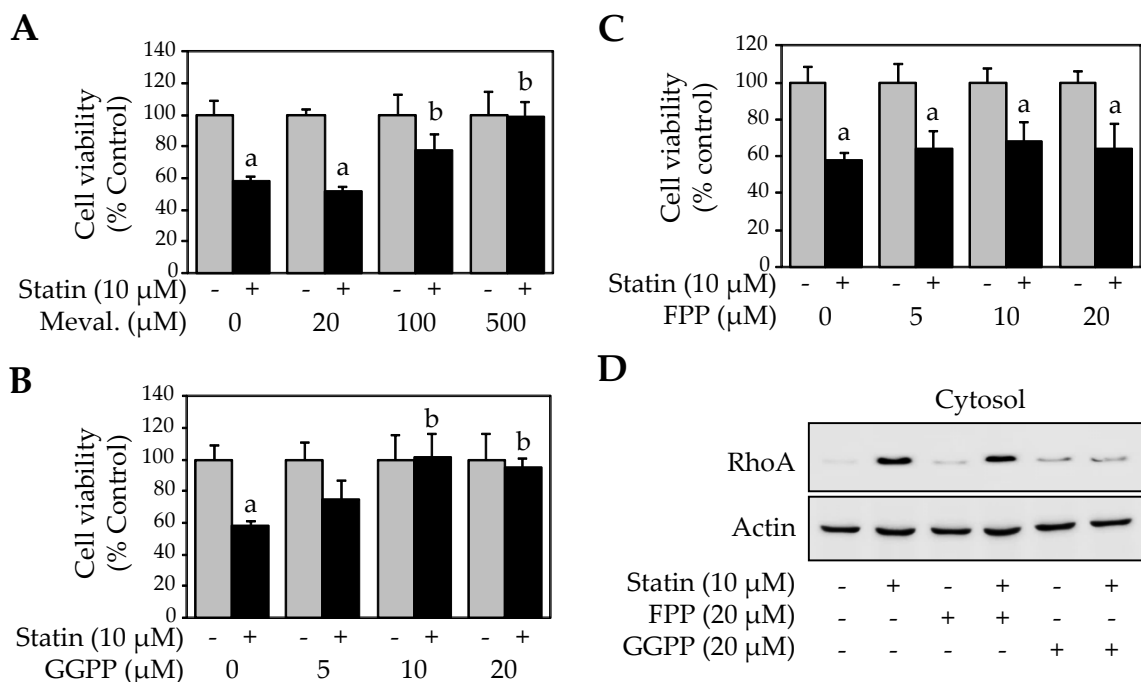

**Supplemental Figure S1. Statin-reduced Osteosarcoma Cell viability Involves GGPP-dependent prenylation.** (A-C) Murine osteosarcoma cells K7M2 were pretreated for 1 h with increasing concentrations of (A) mevalonate, (B) GGPP or (C) FPP before treatment with/without simvastatin for 24 h. Cell viability was evaluated by the MTT test. Results are expressed as mean  $\pm$  SD (n=6-8) of four independent experiments. a:  $P < 0.05$  compared to pretreatment alone.; b:  $P < 0.05$  compared to simvastatin alone. (D) Cells were pretreated for 1 h with FPP (20  $\mu$ M) or GGPP (20  $\mu$ M) before treatment with/without simvastatin (10  $\mu$ M) for 24 h, then lysed and submitted to subcellular fractionation. The RhoA-GTPase expression level in the cytosolic fractions was determined by western blot analysis. Beta-actin was used as loading control.
